# Supplementary material for: Improving performance of sky-blue perovskite light-emitting diodes by triple additives
Source: Royal Society of Chemistry journal article supplement (doi:10.1039/d4tc00437j), 2024-01-01
Supplement: d4tc00437j1.pdf [file d4tc00437j1.pdf]

## Supplementary Material

### **Improving performance of sky-blue perovskite light-emitting diodes by triple additives**

Dan Chen, Ganshuai Zhang, Yu Mao, Ji chen Zhao, Xiang lan Huang, Jian Wang\* and Junbiao Peng

Institute of Polymer Optoelectronic Materials and Devices, State Key Laboratory of Luminescent Materials and Devices, South China University of Technology, Guangzhou 510640, China. E-mail: [jianwang@scut.edu.cn](mailto:jianwang@scut.edu.cn)

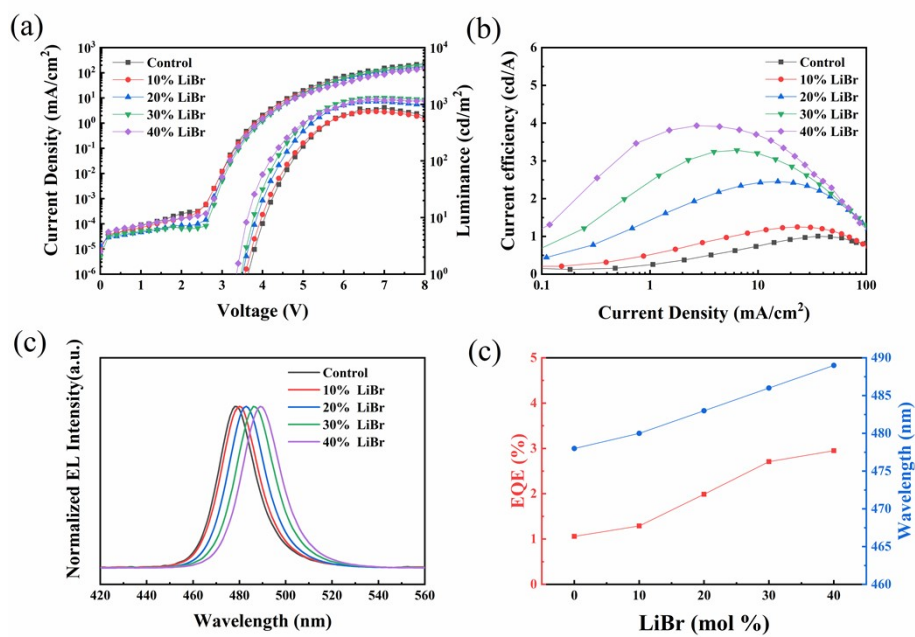

Figure S1. Device performance of PeLEDs with different concentrations of LiBr. (a) *J-V-L* characteristics, (b) CE-*J* characteristics, (c) EL spectra of PeLEDs at an operating voltage of 4 V, and (d) maximum EQE and EL peak wavelength.

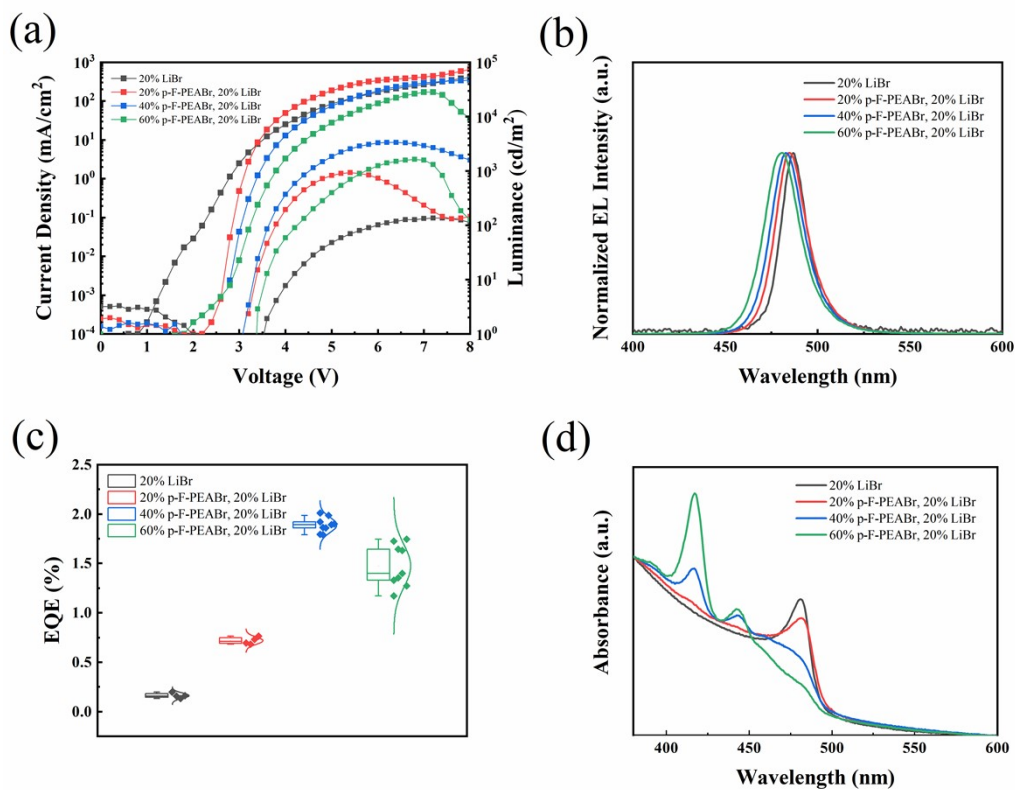

Figure S2. Device performance of PeLEDs with different concentrations of p-F-PEABr. (a) *J-V-L* characteristics, (b) EL spectra of PeLEDs at an operating voltage of 4 V, and (c) maximum EQE, and (d) UV-vis spectra of perovskite films.

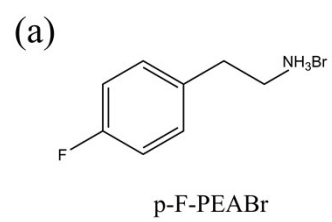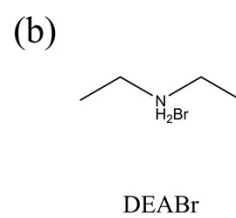

Figure S3. Molecular structures of p-F-PEABr and DEABr.

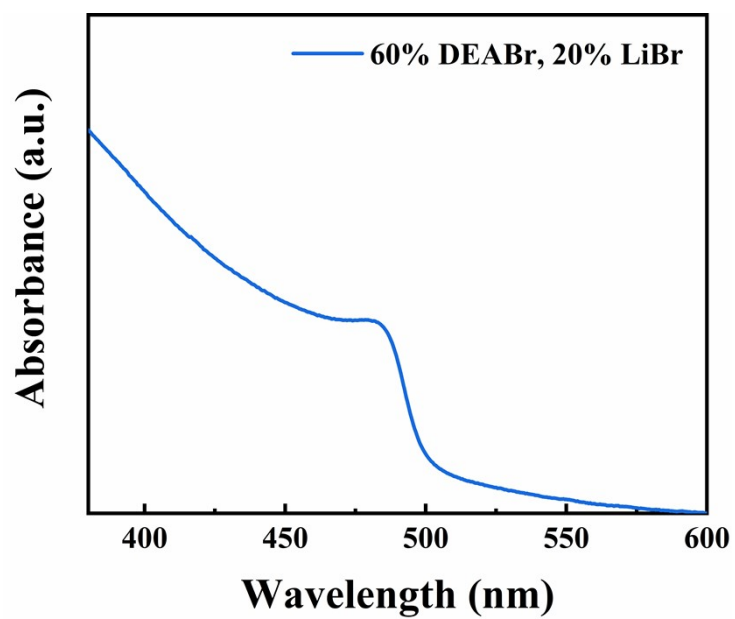

Figure S4. UV-vis spectra of 60% DEABr doped perovskite film.

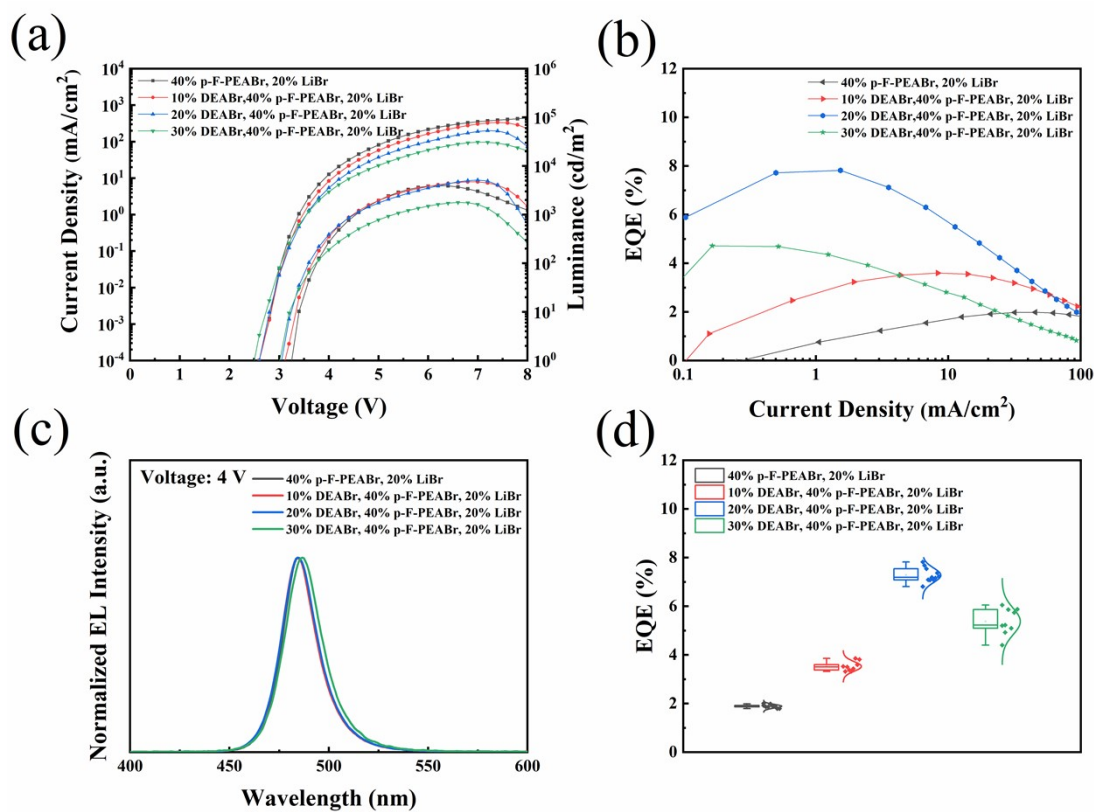

Figure S5. Device performance of PeLEDs with different concentrations of DEABr. (a) *J-V-L* characteristics, (b) EQE-*J* characteristics, (c) EL spectra of PeLEDs at an operating voltage of 4 V, and (d) maximum EQE.

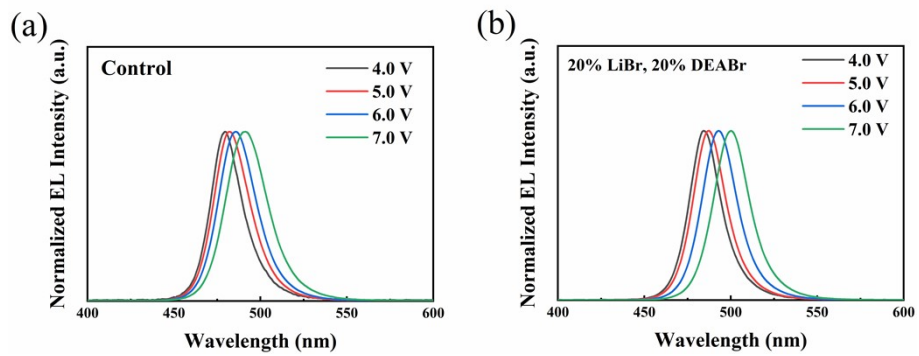

Figure S6. EL spectra under different bias voltages.

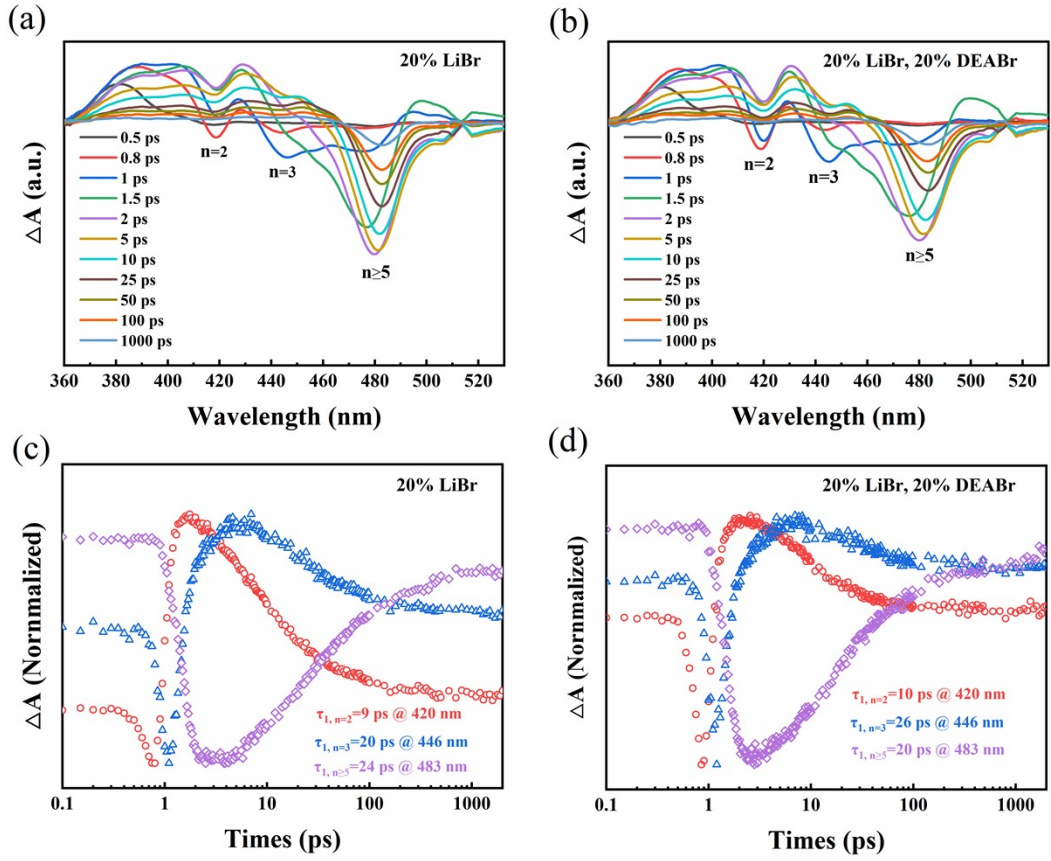

Figure S7. TA spectra of a) 20% LiBr, and b) 20% LiBr, 20% DEABr perovskite films at selected probe delay times. TA spectra of c) 20% LiBr, and d) 20% LiBr, 20% DEABr perovskite films at different wavelength as a function of delay time.



TABLE S1. Fitting parameters for the kinetics shown in Fig. S7 c), d).

| Additive               | Phase | GSB<br>(nm) | $\tau_1$<br>(ps) | $\tau_2$<br>(ps) |
|------------------------|-------|-------------|------------------|------------------|
| 20% LiBr               | n = 2 | 420         | 8.92             | 122.87           |
|                        | n = 3 | 446         | 20.49            | 234.71           |
| 20% LiBr,<br>20% DEABr | n = 2 | 420         | 10.02            | 79.64            |
|                        | n = 3 | 446         | 26.41            | 246.87           |

The kinetics are fitted by the bi-exponential function!:  $\frac{\Delta A(t)}{A} = C_1 e^{-t/\tau_1} + C_2 e^{-t/\tau_2}$ ,

where  $C_1$ , and  $C_2$  are the amplitudes;  $\tau_1$  and  $\tau_2$  are the decay time constants. The fast decay  $\tau_1$  is attributed to the energy transfer from the low n phases to the high n phases. The slow decay  $\tau_2$  is attributed to the nonradiative recombination.

1. B. Wang, Y.-H. Zhou, S. Yuan, Y.-H. Lou, K.-L. Wang, Y. Xia, C.-H. Chen, J. Chen, Y.-R. Shi, Z.-K. Wang and L.-S. Liao, *Angew. Chem. Int. Ed.*, 2023, **62**, e202219255.
